# Supplementary material for: Potential Accumulative Effect of the Herbicide Glyphosate on Glyphosate-Tolerant Maize Rhizobacterial Communities over a Three-Year Cultivation Period
Source: PubMed Central journal article supplement (PMC3214082; doi:10.1371/journal.pone.0027558), 2011-11-11
Supplement: pone.0027558.s002.pdf [file pone.0027558.s002.pdf]

Table S1. Taxonomic breakdown of the more relevant phyla from the twelve soils.

| Field 1                 | 2007                       |            | 2008      |            | 2009      |            |
|-------------------------|----------------------------|------------|-----------|------------|-----------|------------|
|                         | <b>First sampling time</b> |            |           |            |           |            |
| Taxa                    | Untreated                  | Glyphosate | Untreated | Glyphosate | Untreated | Glyphosate |
| <i>Proteobacteria</i>   | 34.2                       | 30.5       | 36.9      | 37.7       | 28.8      | 34.3       |
| <i>Actinobacteria</i>   | 26.3                       | 28.4       | 24.9      | 27.2       | 9.5       | 7.9        |
| <i>Bacteroidetes</i>    | 0.0                        | 0.4        | 0.0       | 0.0        | 0.2       | 0.0        |
| <i>Verrucomicrobia</i>  | 6.4                        | 7.1        | 5.6       | 4.1        | 11.9      | 9.5        |
| <i>Planctomycetes</i>   | 0.5                        | 1.2        | 1.2       | 0.7        | 1.1       | 2.0        |
| <i>Chloroflexi</i>      | 1.2                        | 2.2        | 0.9       | 1.5        | 1.6       | 1.7        |
| <i>Acidobacteria</i>    | 26.3                       | 25.8       | 25.5      | 24.1       | 39.9      | 38.8       |
| <i>Nitrospira</i>       | 1.2                        | 0.9        | 2.5       | 1.2        | 2.1       | 1.8        |
| <i>Gemmatimonadetes</i> | 3.6                        | 3.3        | 2.1       | 3.3        | 4.4       | 4.0        |
| <i>Firmicutes</i>       | 0.3                        | 0.2        | 0.4       | 0.2        | 0.5       | 0.0        |
|                         | <b>Final sampling time</b> |            |           |            |           |            |
| Taxa                    | Untreated                  | Glyphosate | Untreated | Glyphosate | Untreated | Glyphosate |
| <i>Proteobacteria</i>   | 32.6                       | 35.7       | 35.8      | 33.4       | 25.1      | 28.1       |
| <i>Actinobacteria</i>   | 18.1                       | 16.7       | 22.4      | 24.4       | 10.0      | 12.2       |
| <i>Bacteroidetes</i>    | 0.0                        | 0.0        | 0.0       | 0.0        | 0.4       | 0.0        |
| <i>Verrucomicrobia</i>  | 10.1                       | 12.5       | 9.1       | 9.2        | 13.6      | 6.6        |
| <i>Planctomycetes</i>   | 1.0                        | 0.7        | 0.8       | 0.9        | 1.5       | 0.0        |
| <i>Chloroflexi</i>      | 1.5                        | 1.6        | 1.4       | 1.8        | 0.9       | 2.0        |
| <i>Acidobacteria</i>    | 27.5                       | 26.7       | 25.4      | 24.8       | 41.7      | 43.5       |
| <i>Nitrospira</i>       | 1.5                        | 1.2        | 2.3       | 1.6        | 1.6       | 0.7        |
| <i>Gemmatimonadetes</i> | 6.9                        | 3.7        | 2.3       | 4.0        | 5.1       | 6.8        |
| <i>Firmicutes</i>       | 0.5                        | 1.0        | 0.0       | 0.0        | 0.0       | 0.0        |
| Field 2                 | 2007                       |            | 2008      |            | 2009      |            |
|                         | <b>First sampling time</b> |            |           |            |           |            |
| Taxa                    | Untreated                  | Glyphosate | Untreated | Glyphosate | Untreated | Glyphosate |
| <i>Proteobacteria</i>   | 39.8                       | 39.8       | 29.9      | 35.0       | 38.5      | 33.6       |
| <i>Actinobacteria</i>   | 29.2                       | 28.6       | 27.3      | 21.5       | 5.8       | 5.9        |
| <i>Bacteroidetes</i>    | 0.2                        | 0.4        | 0.0       | 0.0        | 0.3       | 0.0        |
| <i>Verrucomicrobia</i>  | 5.2                        | 5.1        | 6.2       | 4.3        | 12.2      | 12.1       |
| <i>Planctomycetes</i>   | 0.6                        | 0.7        | 1.3       | 0.7        | 1.5       | 0.3        |
| <i>Chloroflexi</i>      | 2.1                        | 1.8        | 1.0       | 1.5        | 1.1       | 2.9        |
| <i>Acidobacteria</i>    | 17.8                       | 16.8       | 28.1      | 32.2       | 34.0      | 37.5       |
| <i>Nitrospira</i>       | 1.1                        | 1.9        | 2.8       | 1.3        | 2.3       | 1.1        |
| <i>Gemmatimonadetes</i> | 3.7                        | 4.5        | 2.4       | 3.3        | 4.0       | 6.6        |
| <i>Firmicutes</i>       | 0.3                        | 0.4        | 1.0       | 0.2        | 0.3       | 0.0        |
|                         | <b>Final sampling time</b> |            |           |            |           |            |
| Taxa                    | Untreated                  | Glyphosate | Untreated | Glyphosate | Untreated | Glyphosate |
| <i>Proteobacteria</i>   | 33.2                       | 35.0       | 30.3      | 31.0       | 32.9      | 33.2       |
| <i>Actinobacteria</i>   | 10.6                       | 8.1        | 29.5      | 29.4       | 4.8       | 7.5        |
| <i>Bacteroidetes</i>    | 0.5                        | 1.5        | 0.3       | 0.2        | 0.5       | 0.2        |
| <i>Verrucomicrobia</i>  | 7.7                        | 10.4       | 5.6       | 3.8        | 12.0      | 13.0       |
| <i>Planctomycetes</i>   | 1.2                        | 2.2        | 0.6       | 0.6        | 1.2       | 5.0        |
| <i>Chloroflexi</i>      | 2.5                        | 3.1        | 2.7       | 3.3        | 2.7       | 2.6        |
| <i>Acidobacteria</i>    | 38.1                       | 31.8       | 24.1      | 26.4       | 36.0      | 32.4       |
| <i>Nitrospira</i>       | 1.7                        | 1.5        | 1.6       | 0.9        | 1.8       | 1.5        |
| <i>Gemmatimonadetes</i> | 4.4                        | 6.3        | 5.1       | 4.2        | 7.7       | 4.6        |
| <i>Firmicutes</i>       | 0.1                        | 0.1        | 0.2       | 0.2        | 0.4       | 0.0        |

The percentages of *Proteobacteria*, *Actinobacteria*, *Bacteroidetes*, *Verrucomicrobia*, *Planctomycetes*, *Chloroflexi*, *Acidobacteria*, *Nitrospira*, *Gemmatimonadetes* and *Firmicutes* are indicated for field 1 and field 2 and do not include unassigned sequences.
