# Supplementary material for: Potential Accumulative Effect of the Herbicide Glyphosate on Glyphosate-Tolerant Maize Rhizobacterial Communities over a Three-Year Cultivation Period
Source: PubMed Central journal article supplement (PMC3214082; doi:10.1371/journal.pone.0027558), 2011-11-11
Supplement: pone.0027558.s003.pdf [file pone.0027558.s003.pdf]

Table S2.1. Similarity-based OTUs and species richness estimates at a 3%, 5% and 10% dissimilarity level for the samples from 2007

| Field 1      | 2007                |          |         |          |         |        |            |          |         |          |         |        |
|--------------|---------------------|----------|---------|----------|---------|--------|------------|----------|---------|----------|---------|--------|
|              | First sampling time |          |         |          |         |        |            |          |         |          |         |        |
|              | Untreated           |          |         |          |         |        | Glyphosate |          |         |          |         |        |
|              | M+D+M               |          |         | ESPRIT   |         |        | M+D+M      |          |         | ESPRIT   |         |        |
|              | 3%                  | 5%       | 10%     | 3%       | 5%      | 10%    | 3%         | 5%       | 10%     | 3%       | 5%      | 10%    |
| <b>OTUs</b>  | 631                 | 524      | 306     | 597      | 435     | 195    | 632        | 505      | 300     | 571      | 413     | 186    |
| <b>ACE</b>   | 1555±242            | 1024±133 | 386±34  | 1393     | 765     | 226    | 1371±183   | 843±93   | 391±37  | 1190     | 693     | 206    |
| <b>Chao1</b> | 1497±237            | 1042±162 | 391±44  | 1436±242 | 751±112 | 213±16 | 1281±175   | 802±96   | 369±36  | 1127±162 | 669±95  | 199±13 |
|              | Final sampling time |          |         |          |         |        |            |          |         |          |         |        |
|              | Untreated           |          |         |          |         |        | Glyphosate |          |         |          |         |        |
|              | M+D+M               |          |         | ESPRIT   |         |        | M+D+M      |          |         | ESPRIT   |         |        |
|              | 3%                  | 5%       | 10%     | 3%       | 5%      | 10%    | 3%         | 5%       | 10%     | 3%       | 5%      | 10%    |
| <b>OTUs</b>  | 671                 | 585      | 419     | 592      | 432     | 213    | 569        | 484      | 348     | 575      | 409     | 226    |
| <b>ACE</b>   | 1503±208            | 1147±143 | 704±84  | 1214     | 723     | 246    | 1262±179   | 1036±151 | 597±82  | 1399     | 853     | 293    |
| <b>Chao1</b> | 1413±192            | 1122±153 | 677±95  | 1128±150 | 647±77  | 241±21 | 1217±190   | 1006±171 | 570±91  | 1238±191 | 786±135 | 267±26 |
| Field 2      | 2007                |          |         |          |         |        |            |          |         |          |         |        |
|              | First sampling time |          |         |          |         |        |            |          |         |          |         |        |
|              | Untreated           |          |         |          |         |        | Glyphosate |          |         |          |         |        |
|              | M+D+M               |          |         | ESPRIT   |         |        | M+D+M      |          |         | ESPRIT   |         |        |
|              | 3%                  | 5%       | 10%     | 3%       | 5%      | 10%    | 3%         | 5%       | 10%     | 3%       | 5%      | 10%    |
| <b>OTUs</b>  | 597                 | 478      | 282     | 585      | 413     | 184    | 687        | 576      | 405     | 622      | 445     | 224    |
| <b>ACE</b>   | 1629±273            | 964±133  | 363±35  | 1278     | 1278    | 1278   | 2006±341   | 1254±178 | 718±95  | 1491     | 760     | 259    |
| <b>Chao1</b> | 1476±248            | 907±140  | 354±39  | 1301±204 | 672±93  | 196±12 | 1840±301   | 1168±169 | 677±100 | 1397±214 | 734±101 | 245±17 |
|              | Final sampling time |          |         |          |         |        |            |          |         |          |         |        |
|              | Untreated           |          |         |          |         |        | Glyphosate |          |         |          |         |        |
|              | M+D+M               |          |         | ESPRIT   |         |        | M+D+M      |          |         | ESPRIT   |         |        |
|              | 3%                  | 5%       | 10%     | 3%       | 5%      | 10%    | 3%         | 5%       | 10%     | 3%       | 5%      | 10%    |
| <b>OTUs</b>  | 578                 | 494      | 367     | 481      | 342     | 184    | 603        | 507      | 328     | 499      | 377     | 205    |
| <b>ACE</b>   | 1379±205            | 1014±141 | 716±109 | 977      | 678     | 257    | 1488±218   | 961±124  | 451±45  | 896      | 586     | 244    |
| <b>Chao1</b> | 1389±240            | 1062±186 | 624±99  | 986±169  | 675±135 | 251±43 | 1255±180   | 879±117  | 414±41  | 867±117  | 552±68  | 238±24 |

The species richness estimates were determined by using the combination MUSCLE, DNADIST and Mothur (M+D+M) or the ESPRIT programs as described in Materials and methods.
