# Supplementary material for: Potential Accumulative Effect of the Herbicide Glyphosate on Glyphosate-Tolerant Maize Rhizobacterial Communities over a Three-Year Cultivation Period
Source: PubMed Central journal article supplement (PMC3214082; doi:10.1371/journal.pone.0027558), 2011-11-11
Supplement: pone.0027558.s005.pdf [file pone.0027558.s005.pdf]

Table S2.3. Similarity-based OTUs and species richness estimates at a 3%, 5% and 10% dissimilarity level for the samples from 2009

| Field 1             |           |          |        |          |         |        |            |          |        |          |         |        |
|---------------------|-----------|----------|--------|----------|---------|--------|------------|----------|--------|----------|---------|--------|
| 2009                |           |          |        |          |         |        |            |          |        |          |         |        |
| First sampling time |           |          |        |          |         |        |            |          |        |          |         |        |
|                     | Untreated |          |        |          |         |        | Glyphosate |          |        |          |         |        |
|                     | M+D+M     |          |        | ESPRIT   |         |        | M+D+M      |          |        | ESPRIT   |         |        |
|                     | 3%        | 5%       | 10%    | 3%       | 5%      | 10%    | 3%         | 5%       | 10%    | 3%       | 5%      | 10%    |
| <b>OTUs</b>         | 756       | 661      | 463    | 622      | 497     | 279    | 734        | 609      | 402    | 621      | 473     | 242    |
| <b>ACE</b>          | 2794±544  | 1913±324 | 777±90 | 1611     | 1030    | 376    | 2579±465   | 1444±219 | 589±61 | 1552     | 980     | 284    |
| <b>Chao1</b>        | 2583±471  | 1774±299 | 692±78 | 1412±216 | 969±152 | 369±47 | 2447±450   | 1251±175 | 544±56 | 1525±254 | 952±160 | 275±23 |
| Final sampling time |           |          |        |          |         |        |            |          |        |          |         |        |
|                     | Untreated |          |        |          |         |        | Glyphosate |          |        |          |         |        |
|                     | M+D+M     |          |        | ESPRIT   |         |        | M+D+M      |          |        | ESPRIT   |         |        |
|                     | 3%        | 5%       | 10%    | 3%       | 5%      | 10%    | 3%         | 5%       | 10%    | 3%       | 5%      | 10%    |
| <b>OTUs</b>         | 753       | 639      | 401    | 589      | 460     | 255    | 703        | 575      | 345    | 582      | 461     | 236    |
| <b>ACE</b>          | 2481±463  | 1481±223 | 573±57 | 1264     | 885     | 348    | 1779±280   | 1090±134 | 472±46 | 1004     | 748     | 271    |
| <b>Chao1</b>        | 2279±381  | 1338±186 | 554±61 | 1271±197 | 806±117 | 340±46 | 1628±232   | 1003±123 | 460±52 | 923±98   | 680±75  | 264±21 |
| Field 2             |           |          |        |          |         |        |            |          |        |          |         |        |
| 2009                |           |          |        |          |         |        |            |          |        |          |         |        |
| First sampling time |           |          |        |          |         |        |            |          |        |          |         |        |
|                     | Untreated |          |        |          |         |        | Glyphosate |          |        |          |         |        |
|                     | M+D+M     |          |        | ESPRIT   |         |        | M+D+M      |          |        | ESPRIT   |         |        |
|                     | 3%        | 5%       | 10%    | 3%       | 5%      | 10%    | 3%         | 5%       | 10%    | 3%       | 5%      | 10%    |
| <b>OTUs</b>         | 699       | 586      | 380    | 624      | 508     | 272    | 761        | 647      | 408    | 634      | 506     | 283    |
| <b>ACE</b>          | 2222±410  | 1371±198 | 584±67 | 1551     | 1115    | 349    | 2526±452   | 1761±282 | 624±69 | 1344     | 1016    | 388    |
| <b>Chao1</b>        | 1870±301  | 1233±184 | 543±65 | 1408±214 | 932±131 | 339±37 | 2278±376   | 1670±280 | 609±76 | 1323±187 | 951±141 | 400±61 |
| Final sampling time |           |          |        |          |         |        |            |          |        |          |         |        |
|                     | Untreated |          |        |          |         |        | Glyphosate |          |        |          |         |        |
|                     | M+D+M     |          |        | ESPRIT   |         |        | M+D+M      |          |        | ESPRIT   |         |        |
|                     | 3%        | 5%       | 10%    | 3%       | 5%      | 10%    | 3%         | 5%       | 10%    | 3%       | 5%      | 10%    |
| <b>OTUs</b>         | 642       | 527      | 333    | 533      | 410     | 223    | 674        | 547      | 350    | 543      | 393     | 180    |
| <b>ACE</b>          | 1719±282  | 1072±146 | 469±49 | 1072     | 699     | 275    | 2120±397   | 1262±185 | 497±52 | 1324     | 673     | 196    |
| <b>Chao1</b>        | 1476±223  | 964±133  | 466±60 | 900±110  | 617±76  | 261±25 | 1993±356   | 1149±180 | 483±58 | 1241±212 | 648±95  | 187±9  |

The species richness estimates were determined by using the combination MUSCLE, DNADIST and Mothur (M+D+M) or the ESPRIT programs as described in Materials and methods.
