# Supplementary material for: Potential Accumulative Effect of the Herbicide Glyphosate on Glyphosate-Tolerant Maize Rhizobacterial Communities over a Three-Year Cultivation Period
Source: PubMed Central journal article supplement (PMC3214082; doi:10.1371/journal.pone.0027558), 2011-11-11
Supplement: pone.0027558.s006.pdf [file pone.0027558.s006.pdf]

Table S3. Roche Multiplex identifiers (MIDs)

| Year | Sampling time      | Field              | Treatment          | MID sequence       | Reads |
|------|--------------------|--------------------|--------------------|--------------------|-------|
| 2007 | First              | 1                  | Untreated          | 5'- CGTGTCTCTA -3' | 8000  |
|      |                    |                    | Glyphosate-treated | 5'- CTCGCGTGTC -3' | 5876  |
|      | Final              | 2                  | Untreated          | 5'- TCTCTATGCG -3' | 13967 |
|      |                    |                    | Glyphosate-treated | 5'- TGATACGTCT -3' | 10561 |
|      |                    | 1                  | Untreated          | 5'- CATAGTAGTG -3' | 13606 |
|      |                    |                    | Glyphosate-treated | 5'- CGAGAGATAC -3' | 15477 |
| 2    | Untreated          | 5'- ACGCTCGACA -3' | 39293              |                    |       |
|      | Glyphosate-treated | 5'- AGACGCACTC -3' | 38052              |                    |       |
| 2008 | First              | 1                  | Untreated          | 5'- ATCAGACACG -3' | 4946  |
|      |                    |                    | Glyphosate-treated | 5'- ATATCGCGAG -3' | 8725  |
|      | Final              | 2                  | Untreated          | 5'- CTCGCGTGTC -3' | 7361  |
|      |                    |                    | Glyphosate-treated | 5'- TAGTATCAGC -3' | 20146 |
|      |                    | 1                  | Untreated          | 5'- TGATACGTCT -3' | 11170 |
|      |                    |                    | Glyphosate-treated | 5'- TACTGAGCTA -3' | 3429  |
| 2    | Untreated          | 5'- CGAGAGATAC -3' | 10964              |                    |       |
|      | Glyphosate-treated | 5'- ACGAGTGCCT -3' | 15457              |                    |       |
| 2009 | First              | 1                  | Untreated          | 5'- AGACGCACTC -3' | 16732 |
|      |                    |                    | Glyphosate-treated | 5'- AGCACTGTAG -3' | 4893  |
|      | Final              | 2                  | Untreated          | 5'- ATATCGCGAG -3' | 9300  |
|      |                    |                    | Glyphosate-treated | 5'- CGTGTCTCTA -3' | 5170  |
|      |                    | 1                  | Untreated          | 5'- TAGTATCAGC -3' | 6399  |
|      |                    |                    | Glyphosate-treated | 5'- TCTCTATGCG -3' | 9916  |
| 2    | Untreated          | 5'- TACTGAGCTA -3' | 36103              |                    |       |
|      | Glyphosate-treated | 5'- CATAGTAGTG -3' | 6186               |                    |       |

The Multiplex identifiers (MIDs) used for pyrosequencing of the different samples are shown.
